# Supplementary material for: Population modeling with machine learning can enhance measures of mental health
Source: Oxford University Press journal article supplement (doi:10.1093/gigascience/giab071), 2021-10-01
Supplement: giab071_response_to_reviewer_comments_revision_2.pdf [file giab071_response_to_reviewer_comments_revision_2.pdf]

## Author's Response To Reviewer Comments

Close

Dear Hans, I have updated the data access section and included a diff file (PDF) for your convenience.  
Best wishes,  
Denis

Close
