# Supplementary material for: Population modeling with machine learning can enhance measures of mental health
Source: Oxford University Press journal article supplement (doi:10.1093/gigascience/giab071), 2021-10-01
Supplement: giab071_supplemental_file.pdf [file giab071_supplemental_file.pdf]

## Supporting Information

### Appendix 1: Additional results

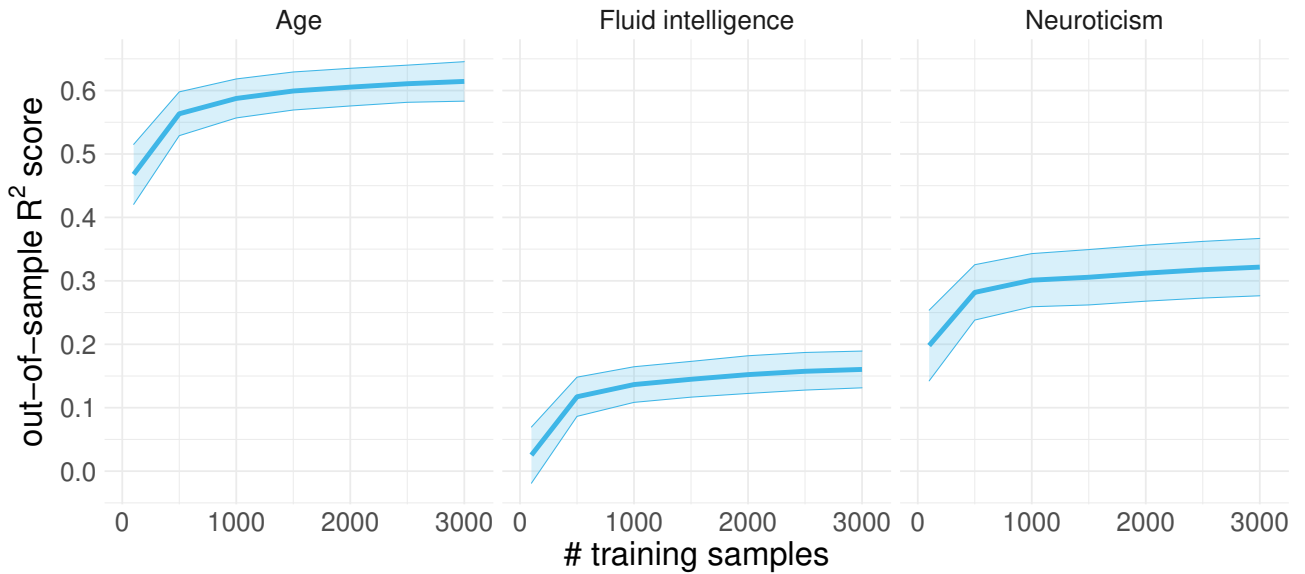

**Figure 1 – Figure supplement 1. Learning curves on the random split-half validation used for model building.** To facilitate comparisons, we evaluated predictions of age, fluid intelligence and neuroticism from a complete set of socio-demographic variables without brain imaging using the coefficient of determination  $R^2$  metric (y-axis) to compare results obtained from 100 to 3000 training samples (x-axis). The cross-validation (CV) distribution was obtained from 100 Monte Carlo splits. Across targets, performance started to plateau after around 1000 training samples with scores virtually identical to the final model used in subsequent analyses. These benchmarks suggest that inclusion of additional training samples would not have led to substantial improvements in performance.

### Marginal associations for **proxy** and **target** measures with health-related habits

#### A proxy measure

# alcoholic beverages  
metabolic equivalent task (minutes/week)  
sleep duration (hours)  
# cigarettes smoked (pack-years)

Brain Age Delta

Predicted Fluid Intelligence

Predicted Neuroticism

#### B target measure

# alcoholic beverages  
metabolic equivalent task (minutes/week)  
sleep duration (hours)  
# cigarettes smoked (pack-years)

Age

Observed Fluid Intelligence

Observed Neuroticism

-0.2 -0.1 0.0 0.1 0.2      -0.2 -0.1 0.0 0.1 0.2      -0.2 -0.1 0.0 0.1 0.2

$\beta_{\text{proxy}} \pm$  bootstrap-based uncertainty estimates

**Figure 2 – Figure supplement 1. Marginal associations between proxy measures and health-related habits.** Marginal (instead of conditional) estimates using univariate regression. Same visual conventions as in Figure 2.

## Specific associations for proxy and target measures with health-related habits

### A proxy measure

# alcoholic beverages  
 metabolic equivalent task (minutes/week)  
 sleep duration (hours)  
 # cigarettes smoked (Pack-Years)

Brain-Predicted Age      Predicted Fluid Intelligence      Predicted Neuroticism

### B target measure

# alcoholic beverages  
 metabolic equivalent task (minutes/week)  
 sleep duration (hours)  
 # cigarettes smoked (pack-years)

Age      Observed Fluid Intelligence      Observed Neuroticism

-0.2 -0.1 0.0 0.1 0.2      -0.2 -0.1 0.0 0.1 0.2      -0.2 -0.1 0.0 0.1 0.2

$\beta_{\text{proxy}} \pm$  bootstrap-based uncertainty estimates

Figure 2 – Figure supplement 2. Conditional associations between proxy measures and health-related habits without explicit brain age delta. Conditional estimates using multivariate regression. Instead of the brain age delta, the brain-predicted age is included alongside an age-deconfounder as used in the main analysis. Same visual conventions as in Figure 2.

## Specific associations for proxy and target measures with health-related habits

### A proxy measure

# alcoholic beverages  
 metabolic equivalent task (minutes/week)  
 sleep duration (hours)  
 # cigarettes smoked (pack-years)

Brain-Predicted Age      Predicted Fluid Intelligence      Predicted Neuroticism

### B target measure

# alcoholic beverages  
 metabolic equivalent task (minutes/week)  
 sleep duration (hours)  
 # cigarettes smoked (pack-years)

Age      Observed Fluid Intelligence      Observed Neuroticism

-0.2 -0.1 0.0 0.1 0.2      -0.2 -0.1 0.0 0.1 0.2      -0.2 -0.1 0.0 0.1 0.2

$\beta_{\text{proxy}} \pm$  bootstrap-based uncertainty estimates

Figure 2 – Figure supplement 3. Conditional associations between proxy measures and health-related habits with-proxy-specific deconfounding. Conditional estimates using multivariate regression. Instead of the brain age delta, the brain-predicted age is included alongside an age-deconfounder as used in the main analysis. Moreover, predicted fluid intelligence and neuroticism are deconfounded for the target values at training time, analogous to the brain age predictions. Same visual conventions as in Figure 2.

## Health-related habits jointly modeled from proxy and target measures

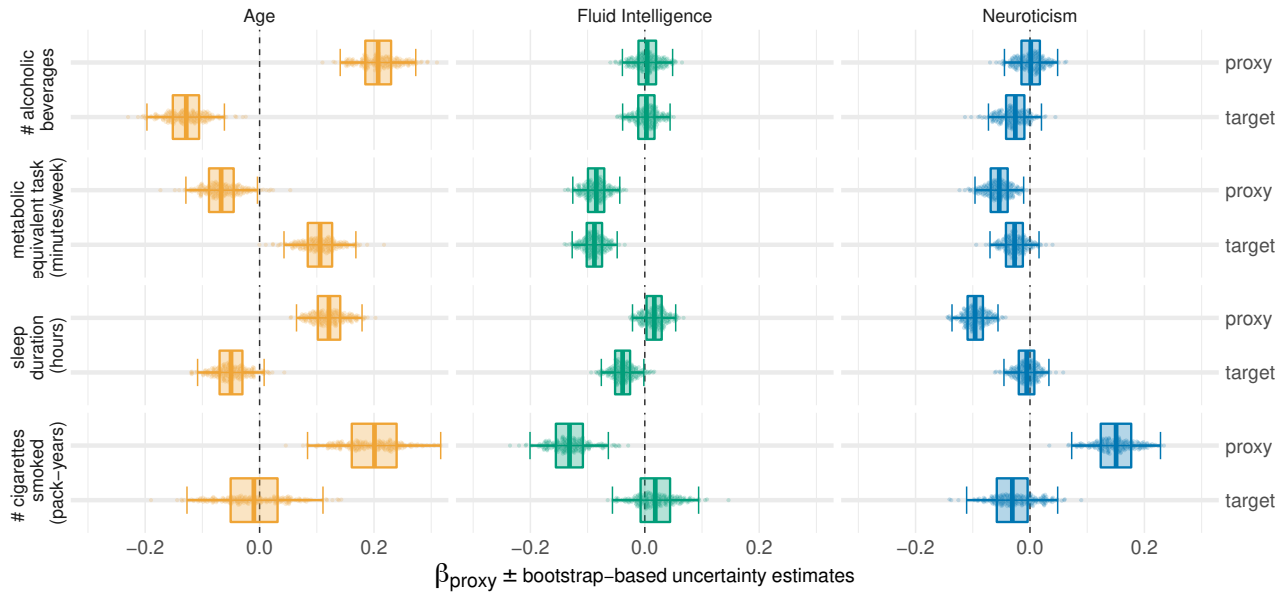

**Figure 2 – Figure supplement 4. Joint modeling of health-related habits from proxy and target measures.** Conditional estimates using multivariate regression. Every health-related habit (double rows) is modeled simultaneously from multiple proxies and targets. Same visual conventions as in Figure 2. Across health-habits, additive effects emerged not only for proxies and targets within the same measure (e.g. age) but also across measures (e.g. age and fluid intelligence). For illustration, we shall consider two examples. Regarding alcohol consumption, age was the most important measure and opposite conditional effects were observed for the proxy and the target: Across the age range, people with higher brain age tended to drink more and across the brain-age range, older people tended to drink less. For smoking, the proxy measures were the most important variables with clear non-zero coefficients, pointing in different directions across target domains. Holding fluid intelligence and neuroticism constant (targets and proxies), people with higher brain age tended to have been smoking for a longer time. At the same time, those who scored lower on predicted fluid intelligence across the entire range of age, predicted age, measured fluid intelligence, predicted neuroticism and neuroticism, have been smoking for a longer time. Finally, those who scored higher on predicted neuroticism tended to smoke more across the ranges of all other measures.

**Table S1.** Paired difference between purely sociodemographic and models including brain imaging on held-out data.

| Target             | sociodemographics | R <sup>2</sup> <sub>diff</sub> | p-value | CI <sub>low</sub> | CI <sub>high</sub> |
|--------------------|-------------------|--------------------------------|---------|-------------------|--------------------|
| Age                | Early Life        | 0.494                          | 0.0001  | 0.473             | 0.515              |
| Age                | Education         | 0.458                          | 0.0001  | 0.437             | 0.479              |
| Age                | Life style        | 0.071                          | 0.0001  | 0.058             | 0.085              |
| Age                | Mood & sentiment  | 0.294                          | 0.0001  | 0.272             | 0.315              |
| Fluid intelligence | Age, Sex          | 0.048                          | 0.0001  | 0.040             | 0.057              |
| Fluid intelligence | Early Life        | 0.039                          | 0.0001  | 0.027             | 0.050              |
| Fluid intelligence | Education         | 0.018                          | 0.0001  | 0.010             | 0.025              |
| Fluid intelligence | Life style        | 0.030                          | 0.0001  | 0.020             | 0.040              |
| Fluid intelligence | Mood & sentiment  | 0.031                          | 0.0001  | 0.019             | 0.043              |
| Neuroticism        | Age, Sex          | 0.001                          | 0.6789  | -0.006            | 0.008              |
| Neuroticism        | Early Life        | 0.010                          | 0.0697  | -0.001            | 0.021              |
| Neuroticism        | Education         | 0.009                          | 0.0817  | -0.001            | 0.020              |
| Neuroticism        | Life style        | -0.008                         | 0.1750  | -0.020            | 0.004              |
| Neuroticism        | Mood & sentiment  | -0.030                         | 0.0001  | -0.041            | -0.018             |

**Table S2.** Difference statistics for classification on the held-out set for sociodemographic vs combined approximation.

| Target             | AUC <sub>diff</sub> observed | p-value | CI <sub>low</sub> | CI <sub>high</sub> |
|--------------------|------------------------------|---------|-------------------|--------------------|
| Age                | 0.013                        | 0.0008  | 0.006             | 0.021              |
| Fluid intelligence | -0.031                       | 0.0001  | -0.044            | -0.017             |
| Neuroticism        | -0.003                       | 0.4818  | -0.013            | 0.006              |

**Table S3.** Inferential statistics for joint proxy–target models of health–related habits

|                              | Outcome                 |                          |                          |                         |
|------------------------------|-------------------------|--------------------------|--------------------------|-------------------------|
|                              | Alcohol                 | Activity                 | Sleep                    | Smoking                 |
| predicted Age                | 0.208***<br>(0.034)     | –0.066**<br>(0.032)      | 0.121***<br>(0.029)      | 0.200***<br>(0.058)     |
| Age                          | –0.129***<br>(0.035)    | 0.105***<br>(0.032)      | –0.050*<br>(0.030)       | –0.008<br>(0.060)       |
| predicted Fluid Intelligence | 0.004<br>(0.022)        | –0.085***<br>(0.021)     | 0.016<br>(0.019)         | –0.132***<br>(0.035)    |
| Fluid Intelligence           | 0.003<br>(0.022)        | –0.088***<br>(0.020)     | –0.038**<br>(0.019)      | 0.018<br>(0.038)        |
| predicted Neuroticism        | 0.001<br>(0.024)        | –0.054**<br>(0.022)      | –0.095***<br>(0.020)     | 0.151***<br>(0.040)     |
| Neuroticism                  | –0.026<br>(0.024)       | –0.027<br>(0.022)        | –0.006<br>(0.020)        | –0.031<br>(0.041)       |
| Constant                     | –0.001<br>(0.019)       | 0.018<br>(0.018)         | 0.017<br>(0.017)         | –0.052<br>(0.034)       |
| Observations                 | 2,687                   | 3,022                    | 3,504                    | 896                     |
| R <sup>2</sup>               | 0.016                   | 0.031                    | 0.020                    | 0.071                   |
| Adjusted R <sup>2</sup>      | 0.014                   | 0.029                    | 0.018                    | 0.064                   |
| Residual Std. Error          | 1.004 (df = 2680)       | 0.997 (df = 3015)        | 0.992 (df = 3497)        | 0.992 (df = 889)        |
| F Statistic                  | 7.334*** (df = 6; 2680) | 15.854*** (df = 6; 3015) | 11.733*** (df = 6; 3497) | 11.256*** (df = 6; 889) |

Note:

\*p&lt;0.1; \*\*p&lt;0.05; \*\*\*p&lt;0.01

**Table S4.** Variance Inflation Factors (VIF) for joint proxy–target models of health–related habits

|                              | Alcohol | Activity | Sleep | Smoking |
|------------------------------|---------|----------|-------|---------|
| predicted Age                | 3.063   | 3.149    | 3.076 | 3.000   |
| Age                          | 3.108   | 3.181    | 3.123 | 3.070   |
| predicted Fluid Intelligence | 1.259   | 1.254    | 1.266 | 1.254   |
| Fluid Intelligence           | 1.220   | 1.223    | 1.229 | 1.229   |
| predicted Neuroticism        | 1.451   | 1.457    | 1.460 | 1.590   |
| Neuroticism                  | 1.434   | 1.435    | 1.439 | 1.552   |

## Approximation quality based on Brain Imaging

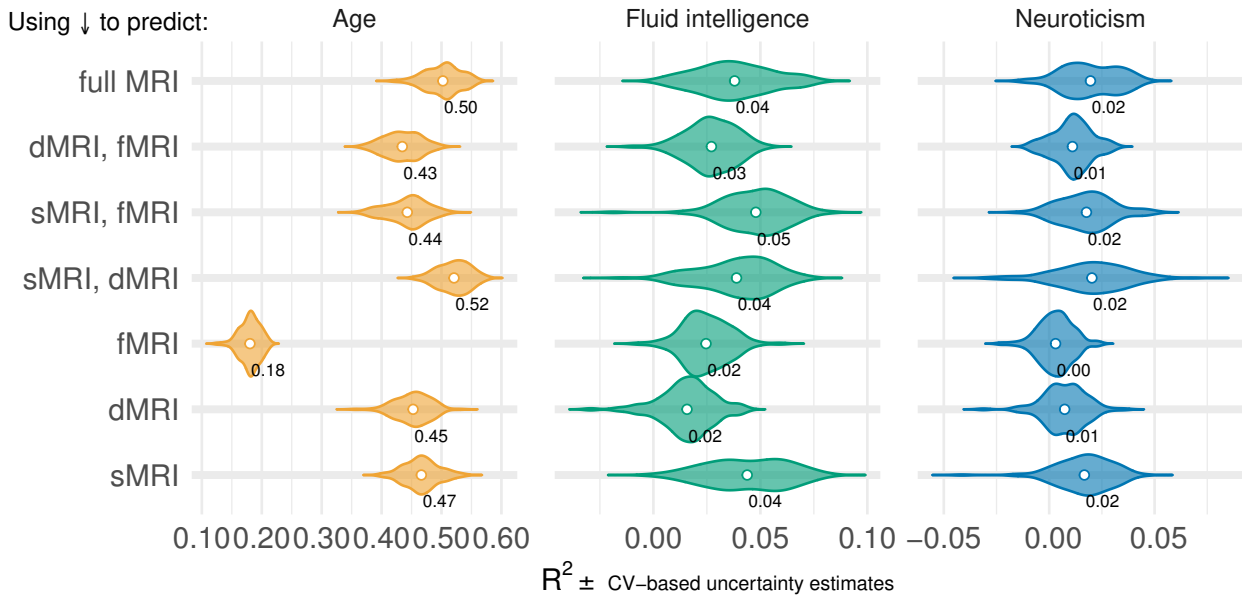

**Figure 3 – Figure supplement 1. Prediction of individual differences in proxy measures from MRI.** Approximation performance using multiple MR modalities on the validation dataset: sMRI, dMRI, rfMRI and their combinations (see Table 1). Visual conventions as in Figure 3. One can see that prediction of age was markedly stronger than prediction of fluid intelligence or prediction of neuroticism. As a general trend, models based on multiple MRI modalities tended to yield better prediction. For simplicity, we based subsequent analyses on the full model based on all MRI data.

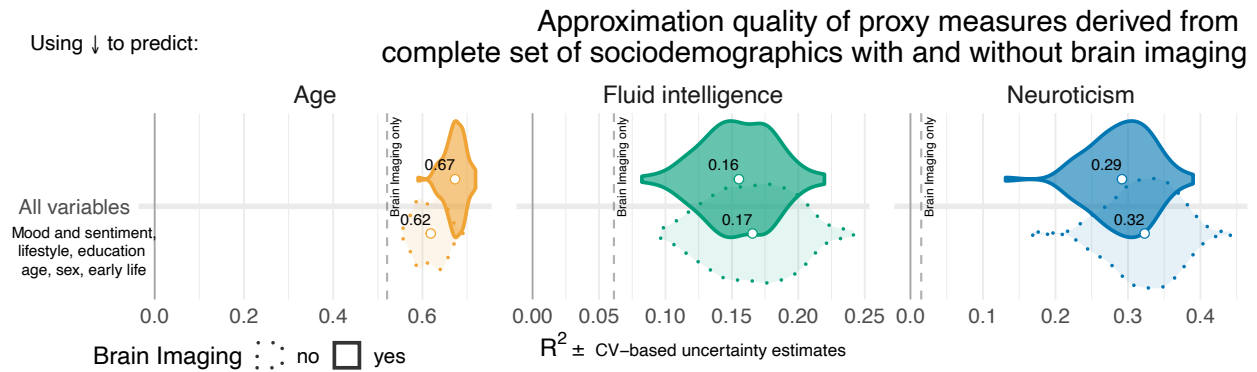

**Figure 3 – Figure supplement 2. Approximation performance using all sociodemographic data.** Approximation performance using all sociodemographic variables with or without brain imaging included on the validation dataset. Visual conventions as in Figure 3. The performance was highly related to the best performing models within each target Figure 3, i.e., life style for age, education for fluid intelligence and mood & sentiment for neuroticism. This suggests that for each target those specific blocks of predictors were sufficiently explaining the performance. For simplicity, we based subsequent analyses on all sociodemographic variables in Figure 2, Figure 3 and Figure 4.

**Table S5. Regression statistics on the held-out set for purely MRI-based approximation.**

| Target             | R <sup>2</sup> <sub>observed</sub> | p-value            | CI <sub>low</sub> | CI <sub>high</sub> |
|--------------------|------------------------------------|--------------------|-------------------|--------------------|
| Age                | 0.521                              | 1×10 <sup>-4</sup> | 0.502             | 0.538              |
| Fluid intelligence | 0.061                              | 1×10 <sup>-4</sup> | 0.052             | 0.070              |
| Neuroticism        | 0.015                              | 1×10 <sup>-4</sup> | 0.005             | 0.024              |

**Table S6.** Classification difference statistics on the held-out set for MRI-based approximation.

| Target             | AUC <sub>observed</sub> | p-value            | CI <sub>low</sub> | CI <sub>high</sub> |
|--------------------|-------------------------|--------------------|-------------------|--------------------|
| Neuroticism        | 0.590                   | $1 \times 10^{-4}$ | 0.566             | 0.614              |
| Age                | 0.916                   | $1 \times 10^{-4}$ | 0.905             | 0.927              |
| Fluid intelligence | 0.667                   | $1 \times 10^{-4}$ | 0.643             | 0.690              |

## Appendix 2: Sociodemographic variables

**Table S7.** List of variables contained in each block of sociodemographic models: mood & sentiment (MS), Age, Sex (AS), Education (EDU), Early life (EL).

| Group                       | UKBB code                     | Variables                                                      |
|-----------------------------|-------------------------------|----------------------------------------------------------------|
| <b>Mood &amp; Sentiment</b> | 2040-2.0                      | Risk taking                                                    |
|                             | 4526-2.0                      | Happiness                                                      |
|                             | 4537-2.0                      | Work/job satisfaction                                          |
|                             | 4548-2.0                      | Health satisfaction                                            |
|                             | 4559-2.0                      | Family relationship satisfaction                               |
|                             | 4570-2.0                      | Friendships satisfaction                                       |
|                             | 4581-2.0                      | Financial situation satisfaction                               |
|                             | 4598-2.0                      | Ever depressed for a whole week                                |
|                             | 4609-2.0                      | Longest period of depression                                   |
|                             | 4620-2.0                      | Number of depression episodes                                  |
|                             | 4631-2.0                      | Ever unenthusiastic/disinterested for a whole week             |
|                             | 4642-2.0                      | Ever manic/hyper for 2 days                                    |
|                             | 4653-2.0                      | Ever highly irritable/argumentative for 2 days                 |
|                             | 2050-2.0                      | Frequency of depressed mood in last 2 weeks                    |
|                             | 2060-2.0                      | Frequency of unenthusiasm / disinterest in last 2 weeks        |
|                             | 2070-2.0                      | Frequency of tenseness / restlessness in last 2 weeks          |
|                             | 2080-2.0                      | Frequency of tiredness / lethargy in last 2 weeks              |
|                             | 2090-2.0                      | Seen doctor (GP) for nerves, anxiety, tension or depression    |
|                             | 2100-1.0                      | Seen a psychiatrist for nerves, anxiety, tension or depression |
|                             | 5375-2.0                      | Longest period of unenthusiasm / disinterest                   |
|                             | 5386-2.0                      | Number of unenthusiastic/disinterested episodes                |
|                             | 5663-2.0                      | Length of longest manic/irritable episode                      |
|                             | 5674-2.0                      | Severity of manic/irritable episode                            |
|                             | 6145-2.0                      | Illness, injury, bereavement, stress in last 2 years           |
|                             | 6156-2.0                      | Manic/hyper symptoms                                           |
|                             | <b>Age, Sex</b>               | 31-0.0                                                         |
| 34-0.0                      |                               | Year of birth                                                  |
| 52-0.0                      |                               | Month of birth                                                 |
| 21022-0.0                   |                               | Age at recruitment                                             |
| 21003-2.0                   |                               | Age when attended assessment centre                            |
| <b>Education</b>            | 6138-2.0                      | Qualifications                                                 |
|                             | 845-2.0                       | Age completed full time education                              |
| <b>Early life</b>           | 1647-2.0                      | Country of birth (UK/elsewhere)                                |
|                             | 1677-2.0                      | Breastfed as a baby                                            |
|                             | 1687-2.0                      | Comparative body size at age 10                                |
|                             | 1697-2.0                      | Comparative height size at age 10                              |
|                             | 1707-2.0                      | Handedness (chirality/laterality)                              |
|                             | 1767-2.0                      | Adopted as a child                                             |
|                             | 1777-2.0                      | Part of a multiple birth                                       |
| 1787-2.0                    | Maternal smoking around birth |                                                                |
| <b>Lifestyle</b>            | 670-2.0                       | Type of accommodation lived in                                 |
|                             | 680-2.0                       | Own or rent accommodation lived in                             |
|                             | 6139-2.0                      | Gas or solid-fuel cooking/heating                              |
|                             | 699-2.0                       | Length of time at current address                              |
|                             | 709-2.0                       | Number in household                                            |
|                             | 6141-2.0                      | How are people in household related to participant             |

*Table S7 continued*

|          |                                                                            |
|----------|----------------------------------------------------------------------------|
| 728-2.0  | Number of vehicles in household                                            |
| 738-2.0  | Income before tax                                                          |
| 796-2.0  | Distance between home and job workplace                                    |
| 757-2.0  | Time employed in main current job                                          |
| 767-2.0  | Length of working week for main job                                        |
| 777-2.0  | Freq. of travelling from home to job workplace                             |
| 6143-2.0 | Transport type for commuting to job workplace                              |
| 6142-2.0 | Current employment status                                                  |
| 806-2.0  | Job involves mainly walking or standing                                    |
| 816-2.0  | Job involves heavy manual or physical work                                 |
| 826-2.0  | Job involves shift work                                                    |
| 3426-2.0 | Job involves night shift work                                              |
| 1031-2.0 | Freq. of friend/ family visits                                             |
| 6160-2.0 | Leisure/social activities                                                  |
| 2110-2.0 | Able to confide                                                            |
| 1239-2.0 | Current tobacco smoking                                                    |
| 1249-2.0 | Past tobacco smoking                                                       |
| 1259-2.0 | Smoking/smokers in household                                               |
| 1269-2.0 | Exposure to tobacco smoke at home                                          |
| 1279-2.0 | Exposure to tobacco smoke outside home                                     |
| 2644-2.0 | Light smokers, at least 100 smokes in lifetime                             |
| 2867-2.0 | Age started smoking in former smokers                                      |
| 2877-2.0 | Type of tobacco previously smoked                                          |
| 2887-2.0 | Number of cigarettes previously smoked daily                               |
| 2897-2.0 | Age stopped smoking                                                        |
| 2907-2.0 | Ever stopped smoking for 6+ months                                         |
| 2926-2.0 | Number of unsuccessful stop-smoking attempts                               |
| 2936-2.0 | Likelihood of resuming smoking                                             |
| 3436-2.0 | Age started smoking in current smokers                                     |
| 3446-2.0 | Type of tobacco currently smoked                                           |
| 3456-2.0 | Number of cigarettes currently<br>smoked daily (current cigarette smokers) |
| 3466-2.0 | Time from waking to first cigarette                                        |
| 3476-2.0 | Difficulty not smoking for 1 day                                           |
| 3486-2.0 | Ever tried to stop smoking                                                 |
| 3496-2.0 | Wants to stop smoking                                                      |
| 3506-2.0 | Smoking compared to 10 years previous                                      |
| 5959-2.0 | Previously smoked cigarettes on most/all days                              |
| 6157-2.0 | Why stopped smoking                                                        |
| 6158-2.0 | Why reduced smoking                                                        |

---



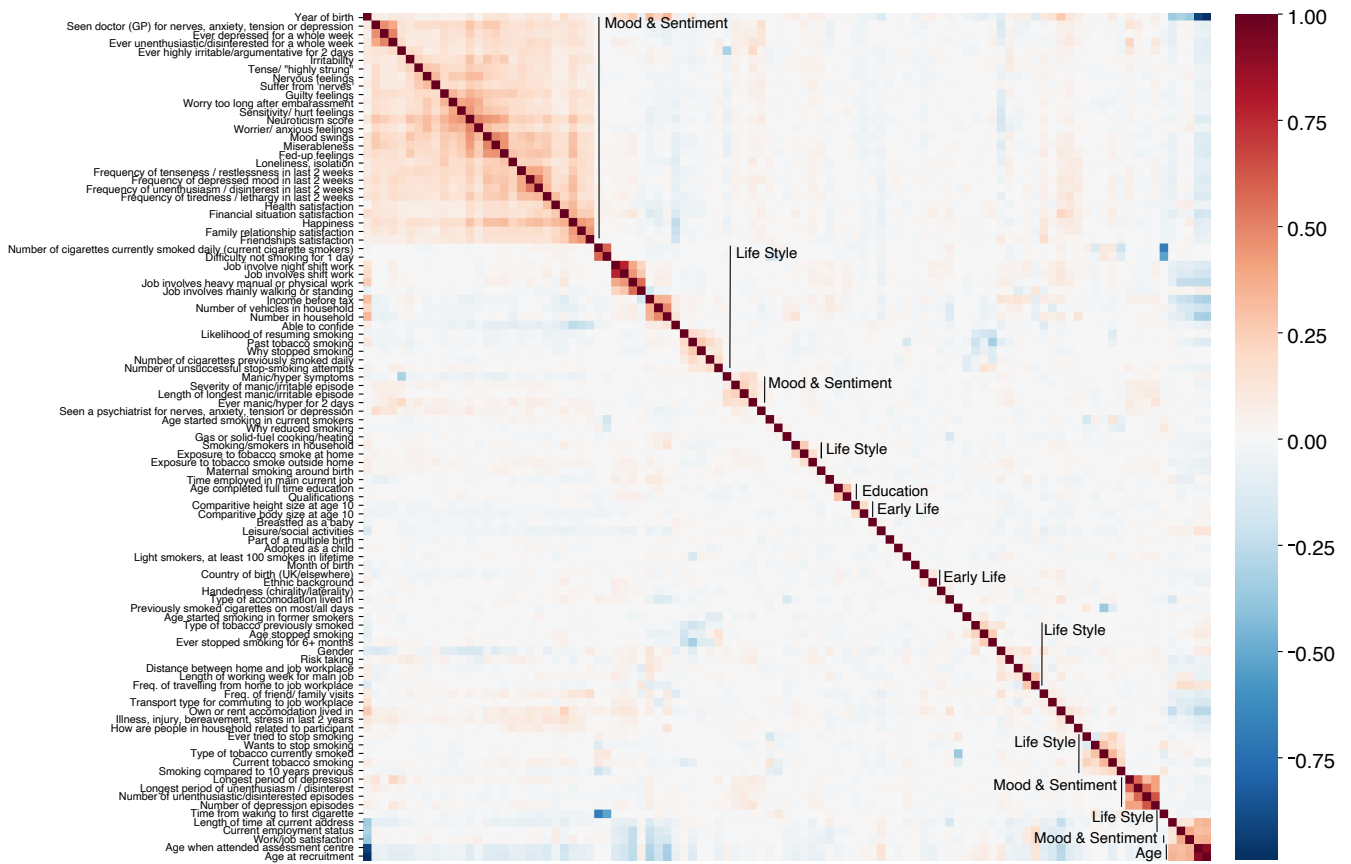

**Figure S1. Inter-correlations between sociodemographic inputs.** To check the plausibility of the proposed grouping of variables into blocks, we investigated the inter-correlations among the sociodemographic inputs (Table S7). We first applied Yeo-Johnson power transform to the variables yield approximately symmetrical distributions. Then we computed Pearson correlations. One can see that a large majority of variables shows low if any inter-correlations. Strongly inter-correlated blocks emerged, in particular for Mood & Sentiment and Life Style. Note that within the Life Style category many smaller blocks with strong inter-correlation occurred, some of which were obviously related to the circumstance of living such as household or employment status.

### Appendix 3: Impact of Measurement Time

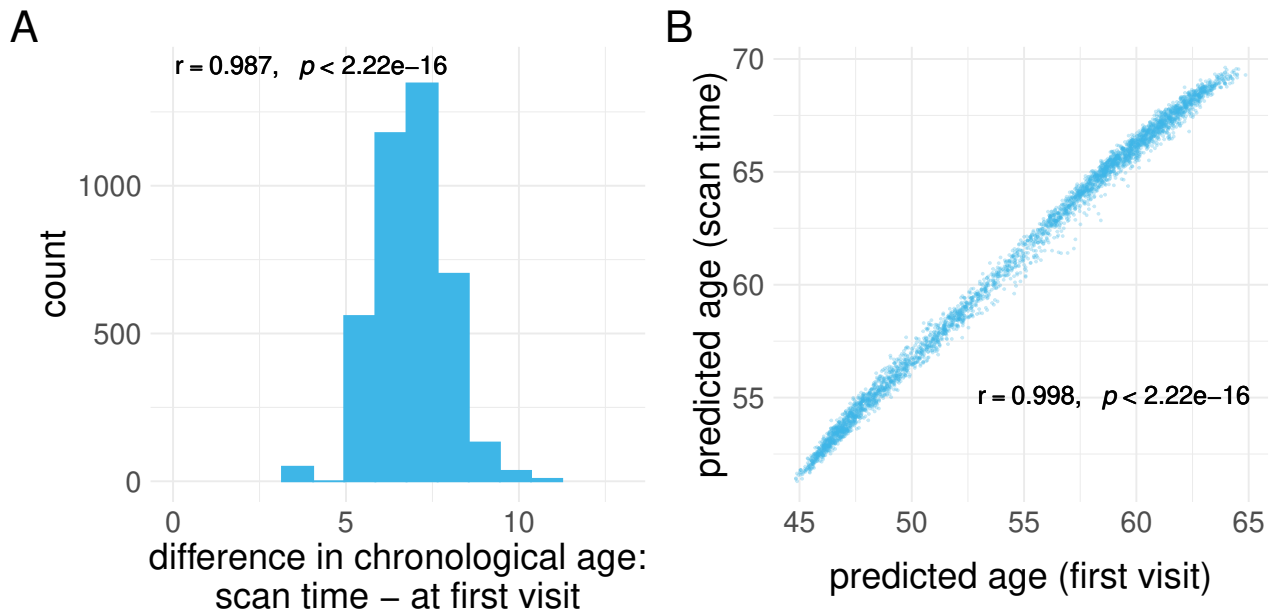

**Figure S2.** Investigating the age gap between the first visit and the MRI-visit time point. (A) Individual gap between age at first visit and MRI-scan time. MRI scans never happened at the first visit, leading to a strictly positive gap greater than five years for most participants. Pearson's correlation coefficient indicates high rank stability, suggesting that, from a statistical perspective, age at first visit and age at scan time are, essentially, interchangeable. (B) Direct comparison of individual-specific age predictions from brain images and sociodemographic data. Same model as in the main analysis (Figure 2). The emerging pattern of association summarized by Pearson's correlation coefficient suggests that predictions from models either trained on age at the first visit or at MRI-scan time are equivalent.

### Specific associations for proxy and target measures with health-related habits

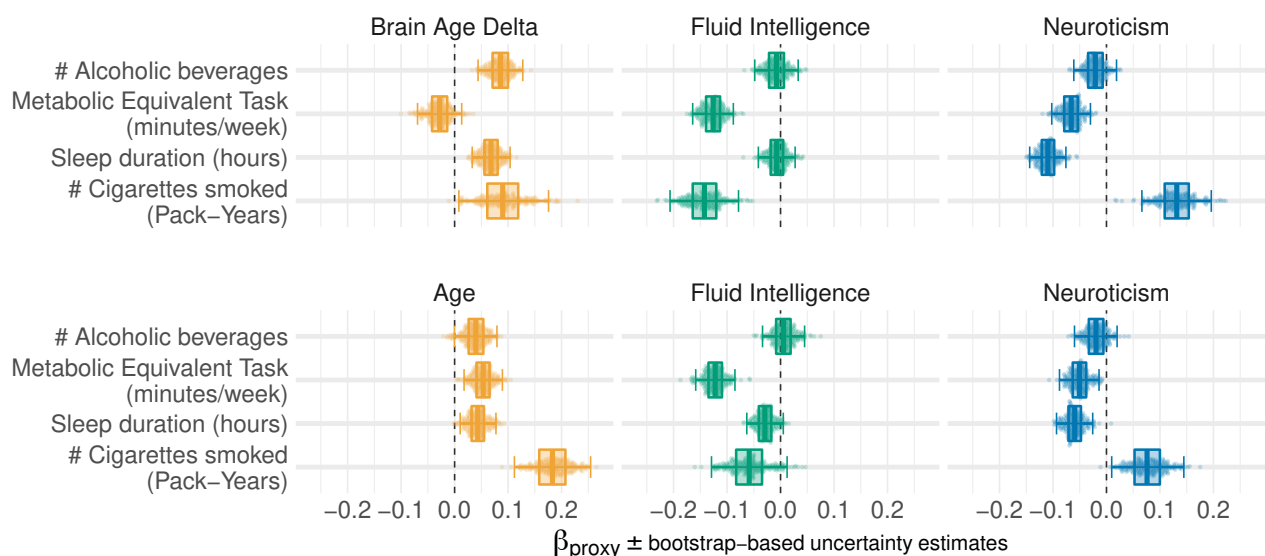

**Figure S3.** Proxy measures show systematic and complementary out-of-sample associations with health-related habits using age at MRI-scan time. The patterns observed in Figure 2 and global conclusions remain unchanged.
